# Supplementary material
Source: PubMed Central journal article supplement (PMC7874395)

**BK Channels Regulate LPS-induced CCL-2 Release from Human Pulmonary Endothelial  
Cells**

Tatiana Zyrianova, Benjamin Lopez, Andy Liao, Charles Gu, Leanne Wong,  
Michela Ottolia, Riccardo Olcese, and Andreas Schwingshackl

ONLINE DATA SUPPLEMENT

## Online Data Supplement

**Supplementary Figure E1. (A)** mRNA expression (Ct) of the pore-forming  $\alpha$ -1-subunit *KCNMA1* and the auxiliary *KCNMB1*, -2, -3, -4  $\beta$ -subunits in human pulmonary microvascular endothelial (HULEC5a, n = 6) and human alveolar epithelial cells (HPAEpiC, A549, and H441; n = 4-7).

**Supplementary Figure E2. Validation of the Em FLIPR assay.** Representative recordings (A, C) and summary plots (B, D; n = 3-6, \*p  $\leq$  0.05) showing the voltage-dependence of the FLIPR assay as dose-response curves to incremental increases in extracellular  $K^+$  ( $K_2SO_4$ ) concentrations (reflective of incremental Em depolarization) in human endothelial Hulec5a (A, B) and epithelial HPAEpiC cells (C, D).  $\Delta$ IF represents the IF values of each  $K^+$  curve after subtracting the values for the 0 mM  $K^+$  control. Black arrows indicate the timing of changes in extracellular  $K^+$  ( $K_2SO_4$ ) concentrations.

**Supplementary Table E1. Complete list of genes altered by NS1619 in LPS-treated human pulmonary microvascular endothelial cells. FC - fold change in gene expression.**

| <b>Gene symbol</b> | <b>Gene description</b>                                                             | <b>FC by NS1619</b> |
|--------------------|-------------------------------------------------------------------------------------|---------------------|
| <i>TNFSF-13B</i>   | Tumor necrosis factor ligand superfamily member 13B/B-cell activating factor (BAFF) | -3.1                |
| <i>CASP-1</i>      | Caspase-1                                                                           | -2.3                |
| <i>ADRB2</i>       | β2-adrenergic receptor                                                              | -2.0                |
| <i>IL1RAPL2</i>    | Interleukin-1 receptor accessory protein-like 2                                     | -1.6                |
| <i>ALOX-5</i>      | Arachidonate 5-lipoxygenase                                                         | -1.5                |
| <i>PTGIS</i>       | Prostaglandin-endoperoxide synthase, cyclooxygenase or COX                          | -1.3                |
| <i>PDE4B</i>       | Phosphodiesterase 4B                                                                | -1.3                |
| <i>PTGER3</i>      | Prostaglandin E Receptor 3                                                          | -1.3                |
| <i>PTGS-2</i>      | Prostaglandin-endoperoxide synthase -2, cyclooxygenase-2 or COX-2                   | 4.3                 |
| <i>PLA2G2A</i>     | Phospholipase A2 Group IIA                                                          | 3.0                 |
| <i>IL-13</i>       | Interleukin-13                                                                      | 2.6                 |
| <i>IL1R1</i>       | Interleukin-1 receptor, type I/Cluster of Differentiation 121a (CD121a)             | 2.4                 |
| <i>KLKB-1</i>      | Kallikrein (KK) B-1                                                                 | 2.1                 |
| <i>PTGFR</i>       | Prostaglandin F Receptor                                                            | 1.9                 |

|                 |                                                                     |     |
|-----------------|---------------------------------------------------------------------|-----|
| <i>PLCE-1</i>   | 1-Phosphatidylinositol-4,5-bisphosphate phosphodiesterase epsilon-1 | 1.9 |
| <i>BDKRB-1</i>  | Prostaglandin-endoperoxide synthase 2, cyclooxygenase-2 or COX-2    | 1.8 |
| <i>HRH-3</i>    | Phospholipase A2 Group IIA                                          | 1.7 |
| <i>LTB4R</i>    | Leukotriene B4 Receptor                                             | 1.7 |
| <i>PLA2G-10</i> | phospholipase A2 group X                                            | 1.7 |
| <i>PLCD-1</i>   | 1-phosphatidylinositol 4,5-bisphosphate phosphodiesterase delta-1   | 1.6 |
| <i>ICAM1</i>    | Intercellular Adhesion Molecule 1                                   | 1.6 |
| <i>PLA2G4C</i>  | Phospholipase A2 group IVC                                          | 1.5 |
| <i>PLCB-4</i>   | Phospholipase C beta-4                                              | 1.4 |
| <i>PTGS-1</i>   | Prostaglandin-endoperoxide synthase 1, cyclooxygenase-1 or COX-1    | 1.3 |
| <i>TNF</i>      | Tumor necrosis factor                                               | 1.3 |
| <i>IL2RB</i>    | Interleukin-2 receptor subunit beta                                 | 1.3 |
| <i>CD40</i>     | Cluster of differentiation 40                                       | 1.2 |
| <i>MAPK-8</i>   | Mitogen-activated protein kinase-8                                  | 1.2 |
| <i>HRH1</i>     | Histamine Receptor H1                                               | 1.1 |

---

## Supplementary Figure E1

A

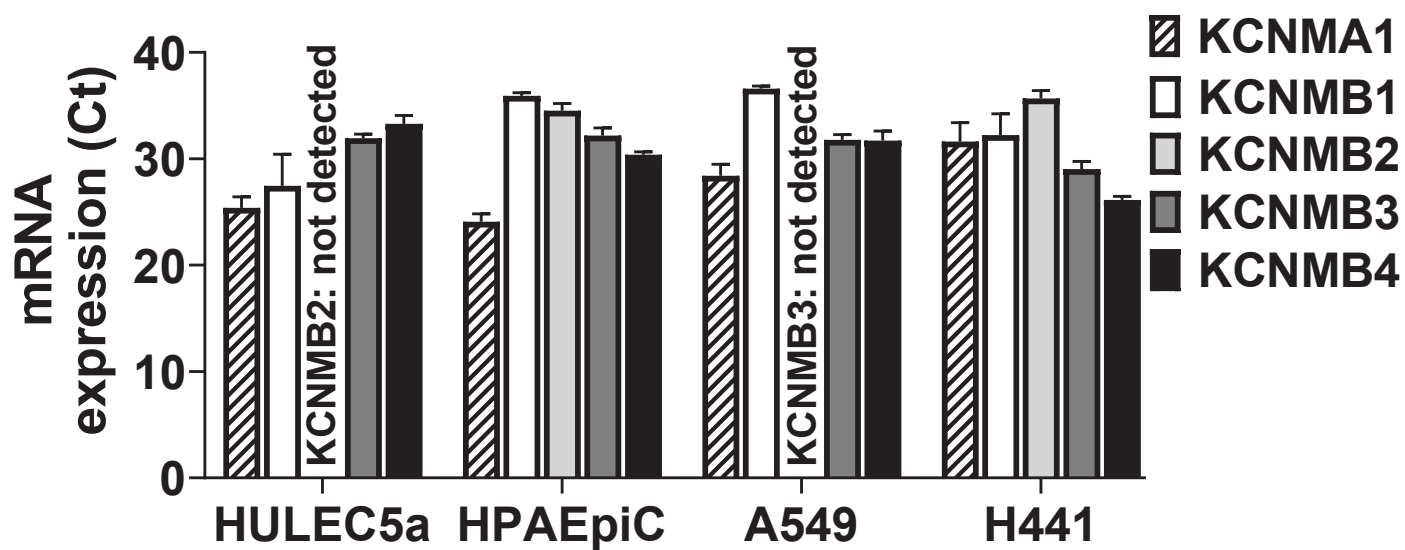

## Supplementary Figure E2

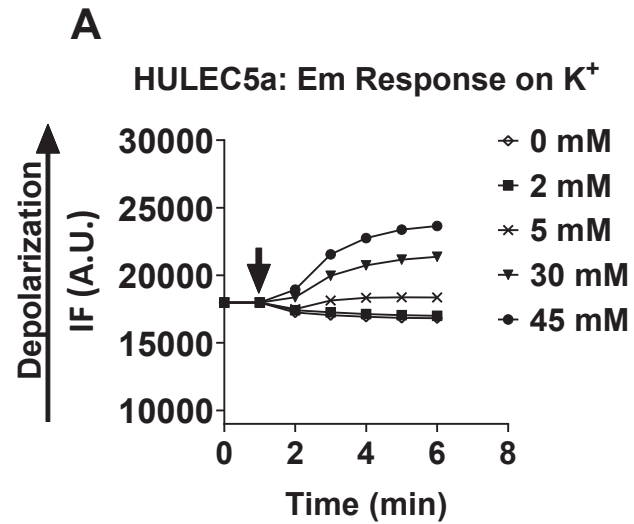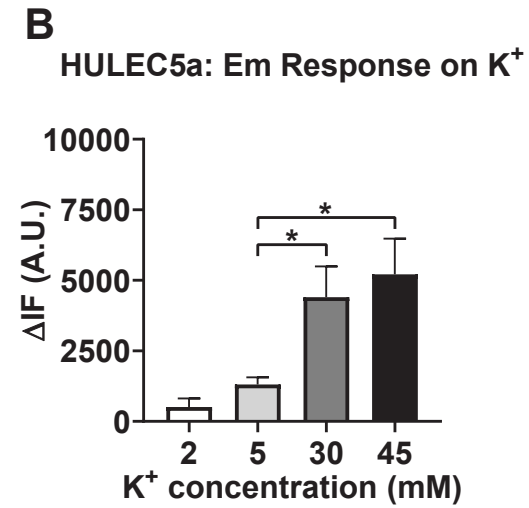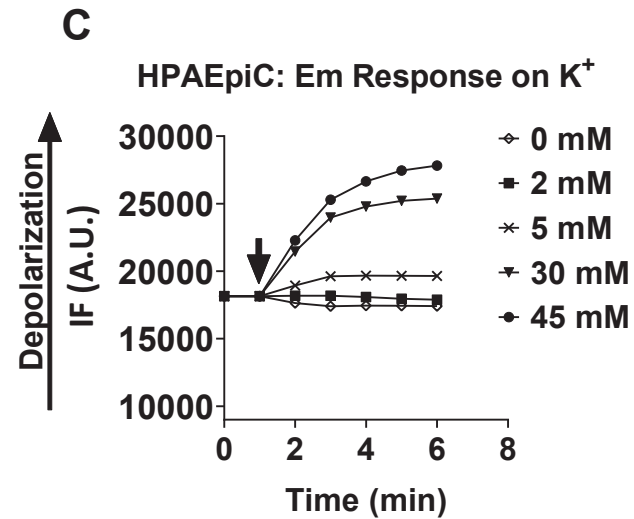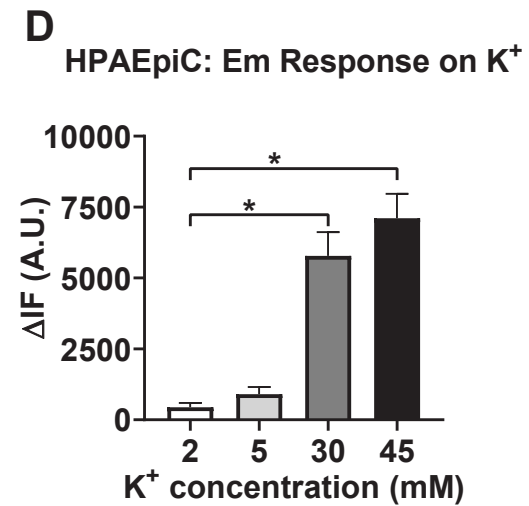

Supplement: rcmb.2020-0228OC_zyrianova_data_supplement.pdf [file rcmb.2020-0228OC_zyrianova_data_supplement.pdf]
